# Supplementary material for: Buried centimeter-long micro- and nanochannel arrays in porous silicon and glass
Source: Royal Society of Chemistry journal article supplement (doi:10.1039/c4lc00062e), 2014-01-01
Supplement: c4lc00062e1.pdf [file c4lc00062e1.pdf]

## SUPPORTING INFORMATION

**Line Fluence:** The standard unit to quantify the number of ions used for irradiation is the areal fluence,  $\psi_a$ , defined as the number of ions incident upon a given surface area, ions/cm<sup>2</sup>. However, for irradiating narrow regions where the surface line width is smaller than the size of ion lateral straggling effect at the end-of-range, a more useful parameter is the line fluence,  $\psi_l$ , given by the number of ions used for irradiating a line of zero width per centimeter of line length. We use the unit of line fluence for irradiations less than 3  $\mu\text{m}$  in width for irradiation with 1 MeV protons where the full-width-at-half-maximum (FWHM) of the lateral scattering at the end-of-range is  $\sim 2 \mu\text{m}$ , and for all results using 100 keV protons where only narrow line irradiations are presented.
